# Supplementary material for: Estimation of bubbled-mediated air/sea gas exchange fromconcurrent DMS and CO 2 transfer velocities atintermediate-high wind speeds
Source: Copernicus journal article supplement (doi:10.5194/acp-2017-85), 2017-02-09
Supplement: Supplementary file 1 [file acp-2017-85-supplement.pdf]

- DMS Solubility:

In the Dacey et al. (1984) study there appears to be an error when converting the Henry's Law coefficients. As a result, the Bunsen (B) and Henry's Law (H) values and equation are incorrect in the original paper. We recommend using the dimensionless Ostwald solubility coefficient for DMS from Dacey et al. (1984), which was described as a function of temperature (T, °K) in Saltzman et al. (1993):

$$\ln(\alpha) = -10.1794 + 3761.33(1/T)$$

Equation S1

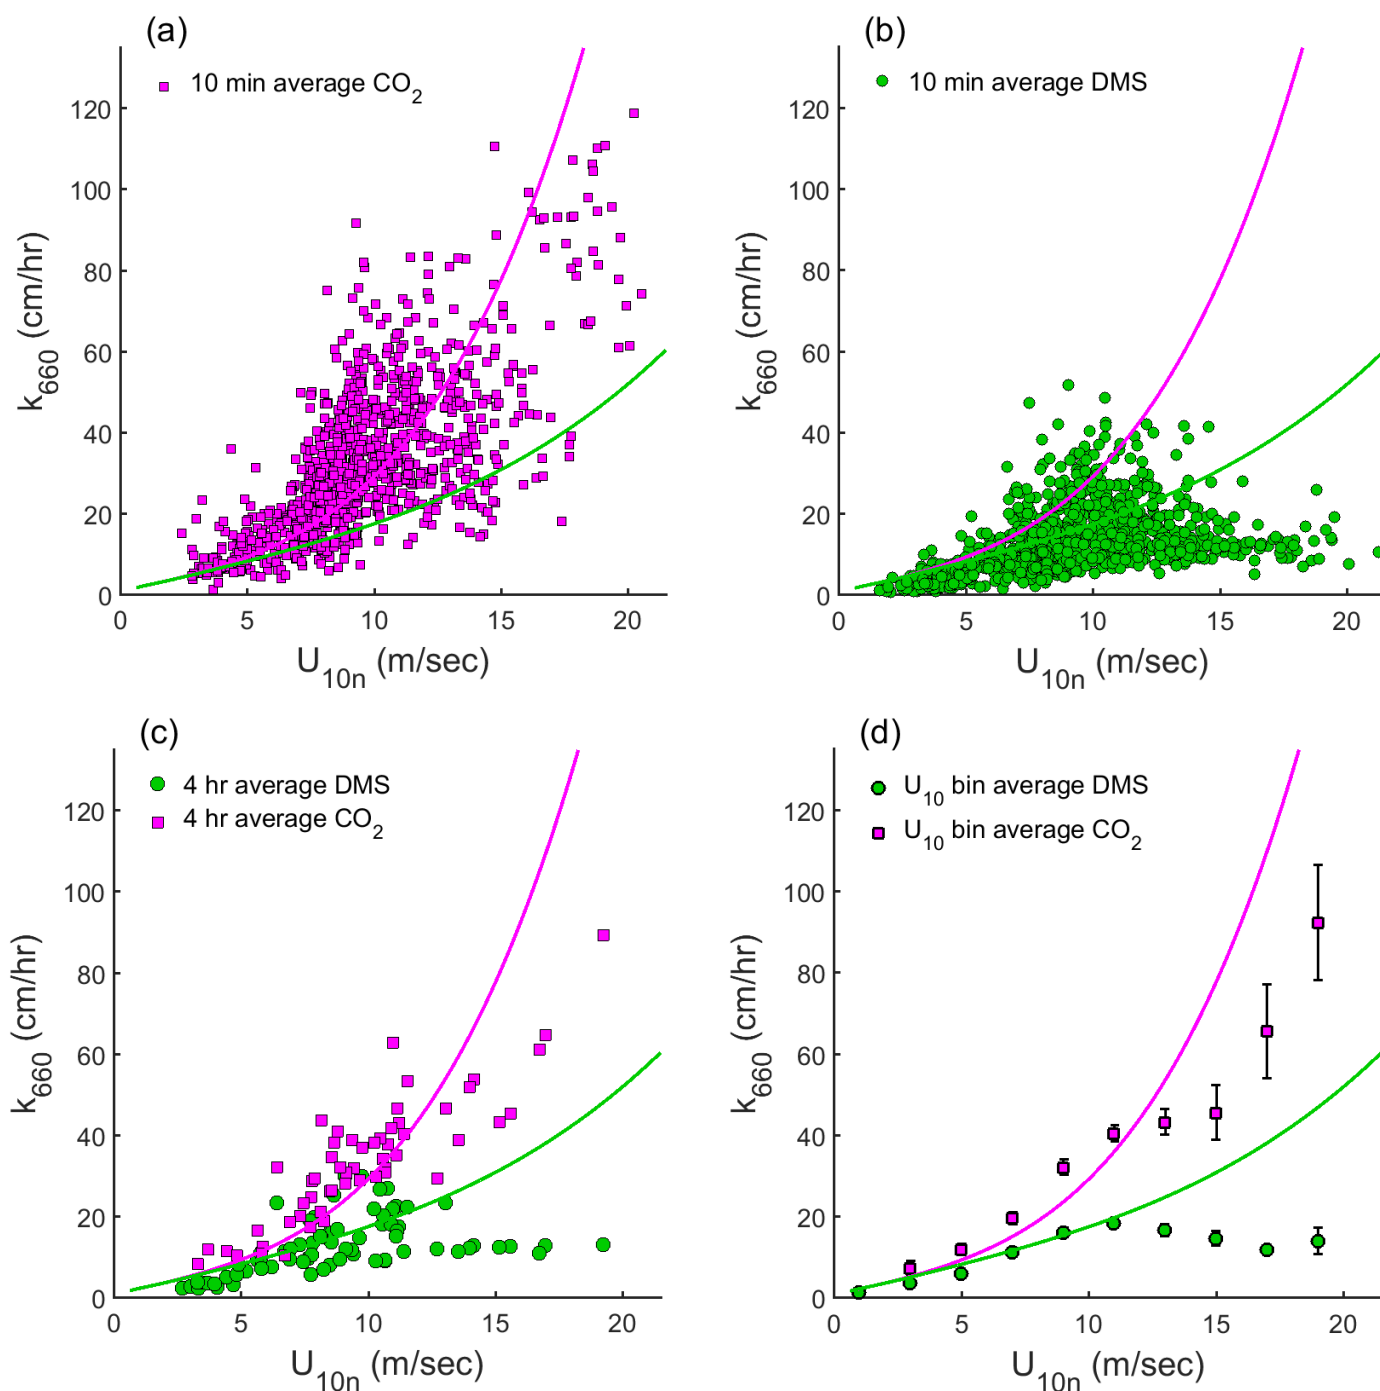

**Figure S1** Equivalent to Figure 5 in main manuscript but with gas transfer velocities normalised to  $Sc=660$  ( $k_{660}$ ).

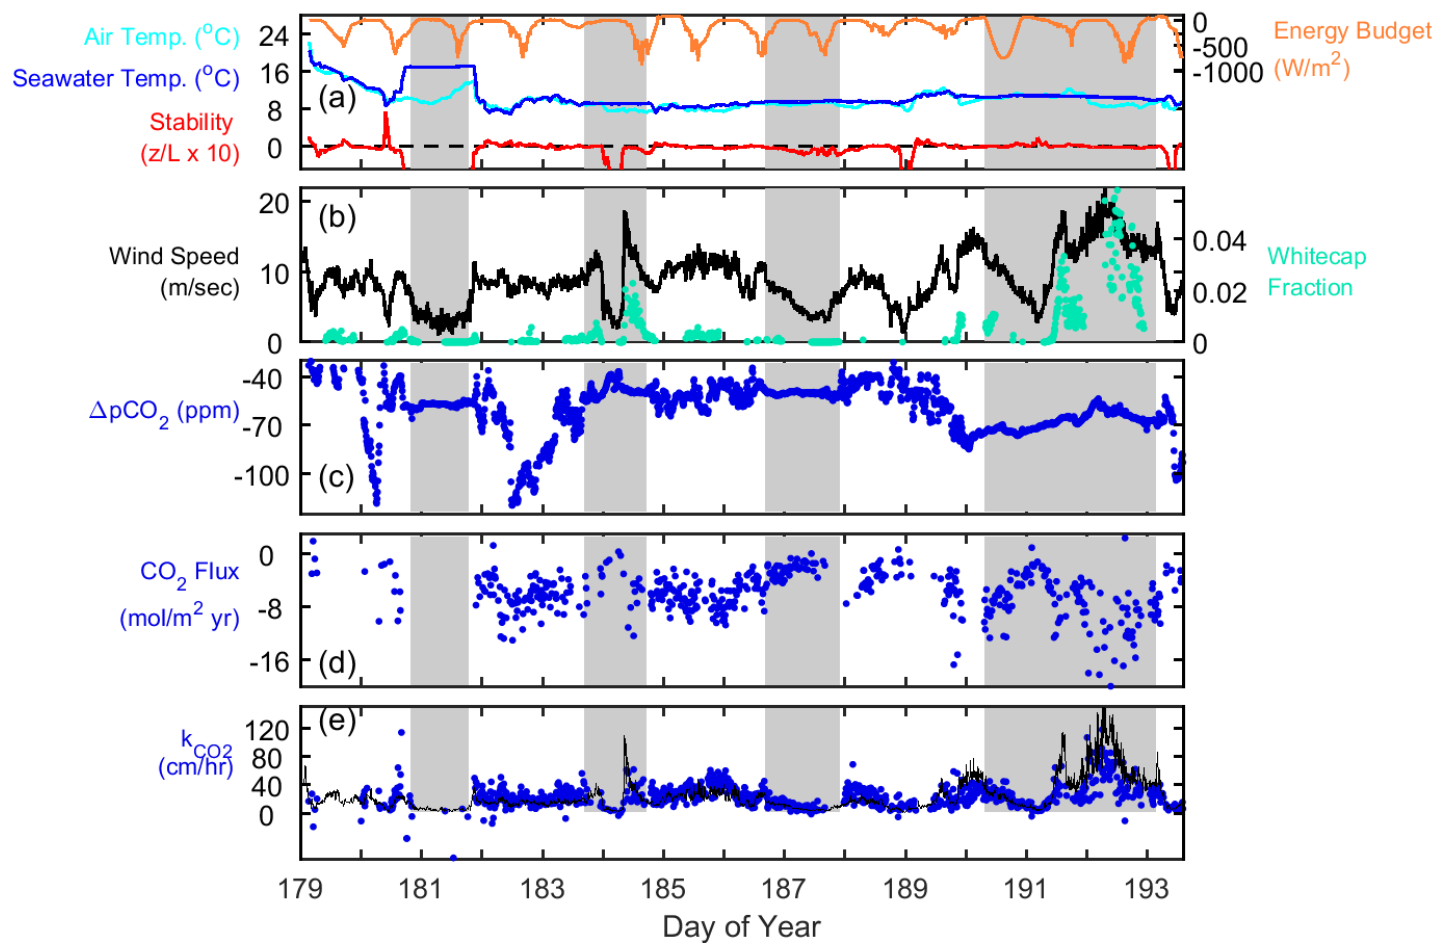

**Figure S2** Replication of Figure 1 in the main manuscript. Axes in panel (e) are not restricted so that all data is plotted.

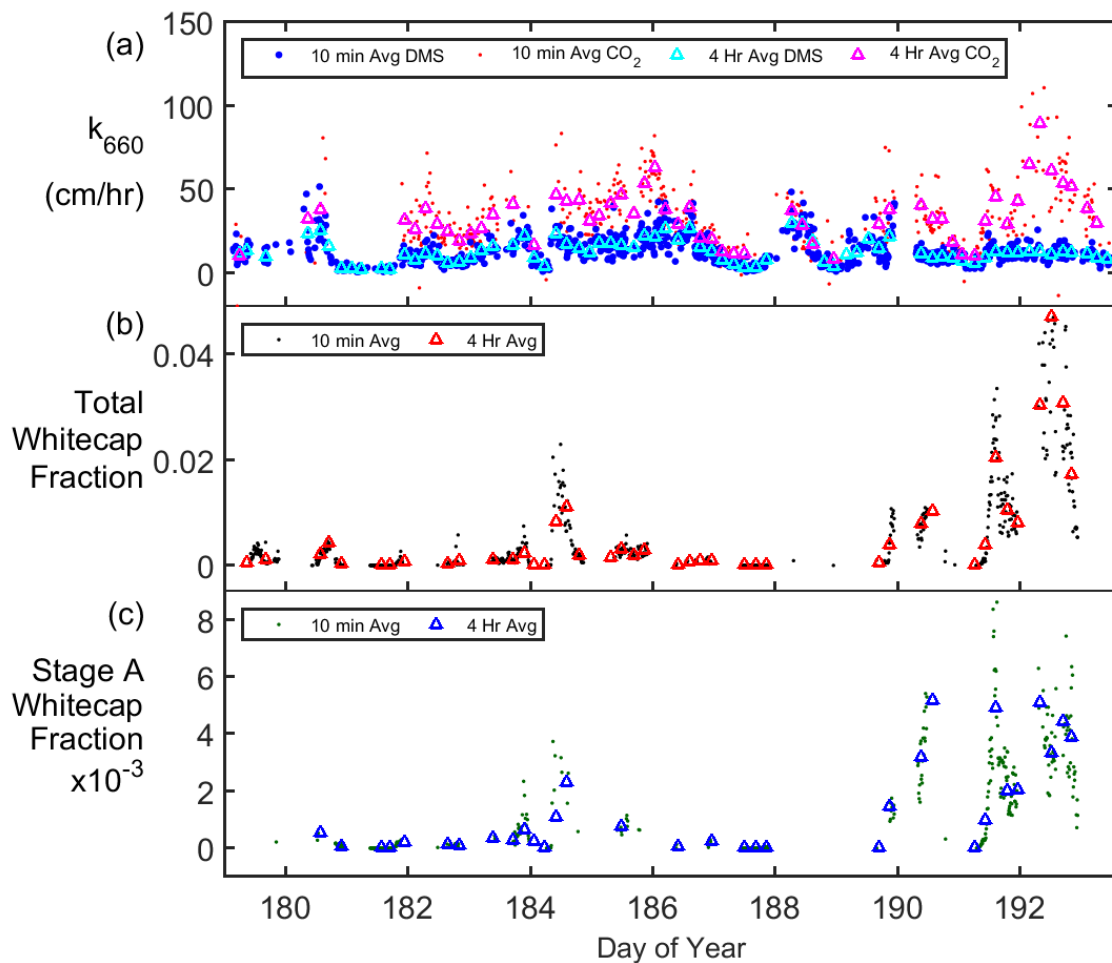

**Figure S3** Timeseries examples of relationship between 10 minute average and 4 hour average data: gas transfer velocities for DMS and CO<sub>2</sub> (upper panel); total whitecap fraction (middle panel); and Stage A whitecap fraction (lower panel).

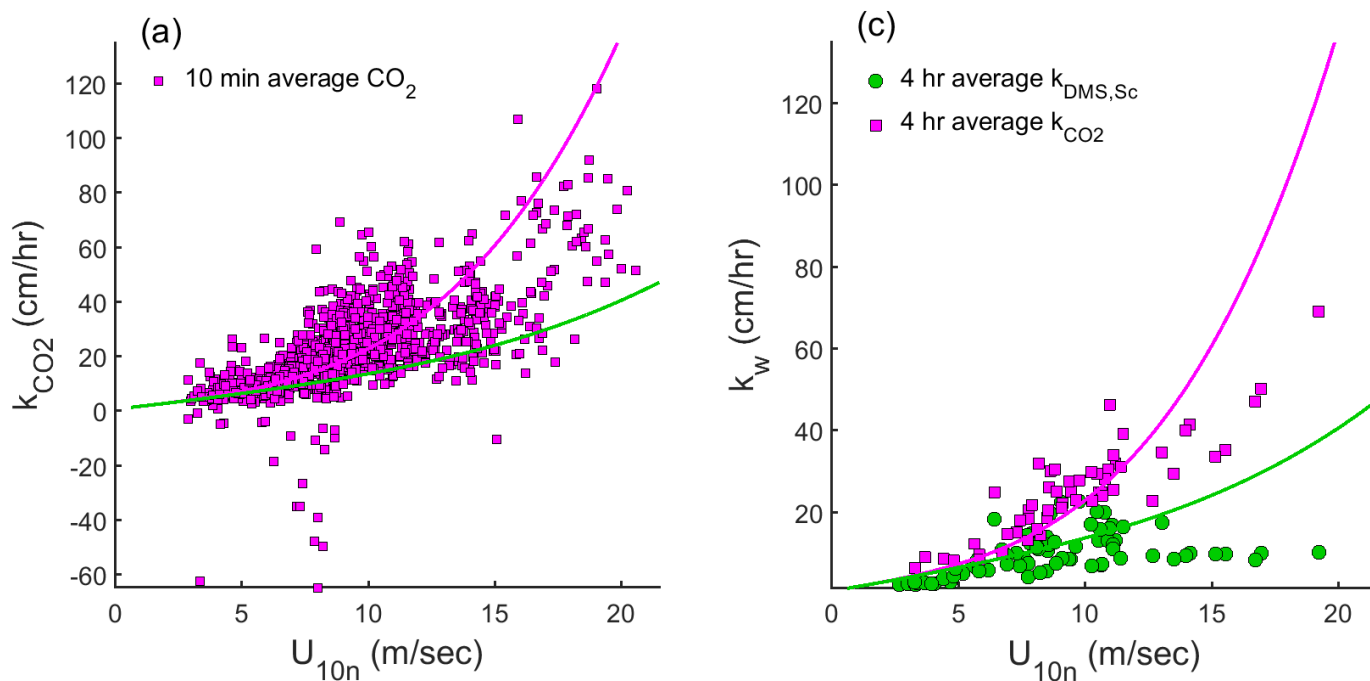

**Figure S4** Replication of Figure 5a and 5c in the main manuscript. Axes are unrestricted so that all data is plotted.

- $k_{bub}$  models:

Asher et al. (2002) model (A02): 
$$k_{bub} = W_C \left( \frac{-37}{\alpha} + 10440\alpha^{-0.41} Sc^{-0.24} \right)$$

Woolf (1997) model (W97): 
$$k_{bub} = \frac{2450W_C}{\alpha \left( 1 + (14\alpha Sc^{-0.5})^{-1/1.2} \right)^{1.2}}$$

Using  $f = \frac{k_{bub,DMS}}{k_{bub,CO_2}}$  we calculate  $f = 0.14$  (A02) and  $f = 0.27$  (W97). Using these estimates of  $f$  with Eqn. 6 (see main text), we use  $\Delta k_w$  to estimate  $k_{bub,CO_2}$ . We also use the same  $k_{bub}$  models to produce normalisation factors (i.e.  $F_n = \text{Model}_{20^\circ C} / \text{Model}_{InSituTemp}$ ) to convert the  $k_{bub,CO_2}$  at in situ temperature (9.8°C) to a standard temperature, 20°C ( $k_{bub,CO_2,20^\circ C}$ ).  $F_{n,A02} = 1.2754$  and  $F_{n,W97} = 1.3142$ .

**Table S1:** Knorr\_11 cruise data (4 hour averaged). Minimum number of 10 minute average data points per 4 hour data interval = 3.  $k_{bub,CO_2}$  is derived from  $\Delta k_w$  using  $f$  and Eqn. 6 (main text).  $k_{bub,CO_2,20^\circ C}$  is calculated from  $k_{bub,CO_2}$  using  $F_n$  (see above).

| Wind Speed<br>( $U_{10m}$ ) | Seawater<br>Temperature<br>(SST, °C) | $k_{DMS}$<br>(cm hr <sup>-1</sup> ) | $k_{CO_2}$<br>(cm hr <sup>-1</sup> ) | $\Delta k_w$<br>(cm hr <sup>-1</sup> ) | $k_{bub,CO_2}$<br>(A02,<br>cm hr <sup>-1</sup> ) | $k_{bub,CO_2}$<br>(W97,<br>cm hr <sup>-1</sup> ) | $k_{bub,CO_2,20^\circ C}$<br>(A02,<br>cm hr <sup>-1</sup> ) | $k_{bub,CO_2,20^\circ C}$<br>(W97,<br>cm hr <sup>-1</sup> ) |
|-----------------------------|--------------------------------------|-------------------------------------|--------------------------------------|----------------------------------------|--------------------------------------------------|--------------------------------------------------|-------------------------------------------------------------|-------------------------------------------------------------|
| 6.72                        | 18.12                                | 8.75                                | 9.87                                 | -0.39                                  | -0.54                                            | -0.46                                            | -0.69                                                       | -0.59                                                       |
| 6.42                        | 10.83                                | 13.42                               | 25.00                                | 9.36                                   | 12.76                                            | 10.92                                            | 16.28                                                       | 13.93                                                       |
| 8.66                        | 11.11                                | 15.24                               | 30.15                                | 12.39                                  | 16.89                                            | 14.45                                            | 21.54                                                       | 18.43                                                       |
| 9.43                        | 11.42                                | 7.09                                | 25.16                                | 16.89                                  | 23.03                                            | 19.70                                            | 29.37                                                       | 25.13                                                       |
| 8.50                        | 7.81                                 | 4.74                                | 18.83                                | 13.34                                  | 18.19                                            | 15.57                                            | 23.20                                                       | 19.85                                                       |
| 9.36                        | 7.68                                 | 6.97                                | 27.68                                | 19.61                                  | 26.73                                            | 22.88                                            | 34.10                                                       | 29.18                                                       |
| 7.78                        | 7.62                                 | 6.15                                | 20.61                                | 13.50                                  | 18.40                                            | 15.74                                            | 23.46                                                       | 20.08                                                       |
| 7.77                        | 9.33                                 | 3.57                                | 18.59                                | 14.44                                  | 19.68                                            | 16.84                                            | 25.10                                                       | 21.48                                                       |
| 8.25                        | 9.85                                 | 4.37                                | 14.50                                | 9.42                                   | 12.85                                            | 10.99                                            | 16.39                                                       | 14.02                                                       |
| 7.44                        | 10.29                                | 5.58                                | 18.06                                | 11.57                                  | 15.77                                            | 13.49                                            | 20.11                                                       | 17.21                                                       |
| 8.54                        | 10.54                                | 8.58                                | 20.61                                | 10.62                                  | 14.48                                            | 12.39                                            | 18.47                                                       | 15.80                                                       |
| 8.57                        | 9.73                                 | 9.66                                | 26.33                                | 15.10                                  | 20.59                                            | 17.61                                            | 26.25                                                       | 22.47                                                       |
| 8.81                        | 9.24                                 | 10.05                               | 30.69                                | 19.02                                  | 25.92                                            | 22.18                                            | 33.06                                                       | 28.29                                                       |
| 5.63                        | 9.12                                 | 5.55                                | 12.39                                | 5.94                                   | 8.10                                             | 6.93                                             | 10.33                                                       | 8.84                                                        |
| 13.05                       | 9.13                                 | 14.15                               | 34.81                                | 18.37                                  | 25.04                                            | 21.43                                            | 31.94                                                       | 27.33                                                       |
| 11.22                       | 9.10                                 | 10.62                               | 32.06                                | 19.72                                  | 26.88                                            | 23.00                                            | 34.29                                                       | 29.34                                                       |
| 8.16                        | 8.68                                 | 8.80                                | 32.08                                | 21.87                                  | 29.81                                            | 25.51                                            | 38.03                                                       | 32.54                                                       |
| 9.13                        | 8.05                                 | 7.15                                | 22.38                                | 14.09                                  | 19.21                                            | 16.44                                            | 24.50                                                       | 20.97                                                       |
| 10.56                       | 8.53                                 | 10.65                               | 25.09                                | 12.74                                  | 17.36                                            | 14.86                                            | 22.15                                                       | 18.95                                                       |
| 10.91                       | 8.37                                 | 10.70                               | 30.51                                | 18.10                                  | 24.68                                            | 21.12                                            | 31.48                                                       | 26.93                                                       |

|       |       |       |       |       |       |       |        |       |
|-------|-------|-------|-------|-------|-------|-------|--------|-------|
| 11.13 | 8.48  | 9.84  | 34.04 | 22.64 | 30.86 | 26.40 | 39.36  | 33.68 |
| 11.10 | 8.28  | 9.10  | 25.58 | 15.04 | 20.50 | 17.54 | 26.14  | 22.37 |
| 11.53 | 8.78  | 13.25 | 39.39 | 24.02 | 32.74 | 28.02 | 41.76  | 35.73 |
| 10.97 | 8.87  | 12.89 | 46.43 | 31.47 | 42.90 | 36.71 | 54.71  | 46.82 |
| 10.77 | 9.11  | 15.72 | 28.24 | 9.99  | 13.62 | 11.65 | 17.37  | 14.86 |
| 7.89  | 9.08  | 11.41 | 21.92 | 8.67  | 11.83 | 10.12 | 15.08  | 12.91 |
| 10.48 | 9.42  | 15.71 | 29.61 | 11.35 | 15.47 | 13.24 | 19.73  | 16.89 |
| 8.12  | 9.54  | 9.11  | 16.05 | 5.47  | 7.45  | 6.38  | 9.51   | 8.14  |
| 7.31  | 9.53  | 7.91  | 15.23 | 6.04  | 8.24  | 7.05  | 10.51  | 8.99  |
| 5.85  | 9.51  | 4.91  | 9.61  | 3.90  | 5.32  | 4.56  | 6.79   | 5.81  |
| 4.43  | 9.48  | 3.13  | 8.62  | 4.98  | 6.79  | 5.81  | 8.66   | 7.41  |
| 3.69  | 9.57  | 2.28  | 8.91  | 6.27  | 8.55  | 7.31  | 10.90  | 9.33  |
| 9.77  | 9.65  | 17.32 | 27.97 | 7.84  | 10.69 | 9.14  | 13.63  | 11.66 |
| 9.09  | 9.45  | 16.93 | 21.25 | 1.58  | 2.16  | 1.84  | 2.75   | 2.35  |
| 7.73  | 9.55  | 11.14 | 13.25 | 0.30  | 0.41  | 0.35  | 0.53   | 0.45  |
| 3.31  | 9.45  | 2.36  | 6.25  | 3.51  | 4.78  | 4.09  | 6.10   | 5.22  |
| 9.65  | 11.57 | 9.54  | 23.18 | 12.06 | 16.43 | 14.06 | 20.96  | 17.94 |
| 10.24 | 10.81 | 13.57 | 29.90 | 14.10 | 19.22 | 16.45 | 24.51  | 20.98 |
| 11.41 | 10.46 | 7.36  | 31.24 | 22.67 | 30.91 | 26.45 | 39.42  | 33.73 |
| 10.66 | 10.61 | 5.91  | 24.94 | 18.06 | 24.62 | 21.06 | 31.40  | 26.87 |
| 8.89  | 10.81 | 6.16  | 25.18 | 18.00 | 24.54 | 21.00 | 31.30  | 26.78 |
| 6.93  | 10.86 | 5.98  | 14.73 | 7.76  | 10.59 | 9.06  | 13.50  | 11.55 |
| 5.82  | 10.84 | 4.59  | 8.47  | 3.12  | 4.25  | 3.64  | 5.42   | 4.64  |
| 4.84  | 10.81 | 3.65  | 8.12  | 3.86  | 5.27  | 4.51  | 6.72   | 5.75  |
| 10.67 | 10.82 | 6.09  | 24.19 | 17.09 | 23.30 | 19.94 | 29.72  | 25.43 |
| 15.58 | 10.76 | 8.26  | 35.45 | 25.83 | 35.22 | 30.14 | 44.92  | 38.44 |
| 12.70 | 10.68 | 7.76  | 22.94 | 13.90 | 18.95 | 16.22 | 24.18  | 20.69 |
| 15.16 | 10.65 | 8.15  | 33.65 | 24.15 | 32.93 | 28.17 | 41.99  | 35.93 |
| 16.96 | 10.59 | 8.36  | 50.35 | 40.61 | 55.37 | 47.38 | 70.61  | 60.42 |
| 19.25 | 10.48 | 8.63  | 69.16 | 59.12 | 80.59 | 68.96 | 102.78 | 87.95 |
| 16.74 | 10.40 | 7.14  | 47.24 | 38.93 | 53.07 | 45.41 | 67.69  | 57.92 |
| 14.14 | 10.41 | 8.36  | 41.64 | 31.91 | 43.50 | 37.22 | 55.48  | 47.48 |
| 13.98 | 10.34 | 7.91  | 40.09 | 30.88 | 42.10 | 36.02 | 53.69  | 45.94 |
| 13.54 | 9.91  | 7.23  | 29.58 | 21.17 | 28.86 | 24.69 | 36.80  | 31.49 |
| 10.30 | 10.16 | 5.82  | 22.94 | 16.18 | 22.05 | 18.87 | 28.12  | 24.07 |

## References

- Asher, W., Edson, J., McGillis, W., Wanninkhof, R., Ho, D. T., and Litchendor, T.: Fractional area whitecap coverage and air-sea gas transfer velocities measured during GasEx-98, in: Gas Transfer at Water Surfaces, American Geophysical Union, 199-203, 2002.
- Dacey, J. W. H., Wakeham, S. G., and Howes, B. L.: Henry's law constants for dimethylsulfide in fresh water and seawater, Geophysical Research Letters, 11, 991-994, 1984.
- Saltzman, E. S., King, D. B., Holmen, K., and Leck, C.: Experimental determination of the diffusion coefficient of dimethylsulfide in water, J Geophys Res-Oceans, 98, 16481-16486, 1993.
- Woolf, D. K.: Bubbles and their role in gas exchange, in: The Sea Surface and Global Change, edited by: Liss, P. S., and Duce, R. A., Cambridge University Press, Cambridge, 173-205, 1997.
